# Supplementary material for: Automated, multiparametric monitoring of respiratory biomarkers and vital signs in clinical and home settings for COVID-19 patients
Source: PubMed Central journal article supplement (PMC8126790; doi:10.1073/pnas.2026610118), 2021-04-23
Supplement: pnas.2026610118.sapp.pdf [file pnas.2026610118.sapp.pdf]

1

## 2 **Supplementary Information for**

### 3 **Automated, multiparametric monitoring of respiratory biomarkers and vital signs in clinical** 4 **and home settings for COVID-19 patients**

5 **Xiaoyue Ni, Wei Ouyang, Hyoyoung Jeong, *et al.***

6 **Corresponding Author name.**

7 **E-mail: [steveu@northwestern.edu](mailto:steveu@northwestern.edu), [jrogers@northwestern.edu](mailto:jrogers@northwestern.edu)**

#### 8 **This PDF file includes:**

- 9 Figs. S1 to S20 (not allowed for Brief Reports)
- 10 Tables S1 to S2 (not allowed for Brief Reports)
- 11 Legend for Movie M1

#### 12 **Other supplementary materials for this manuscript include the following:**

- 13 Movie M1

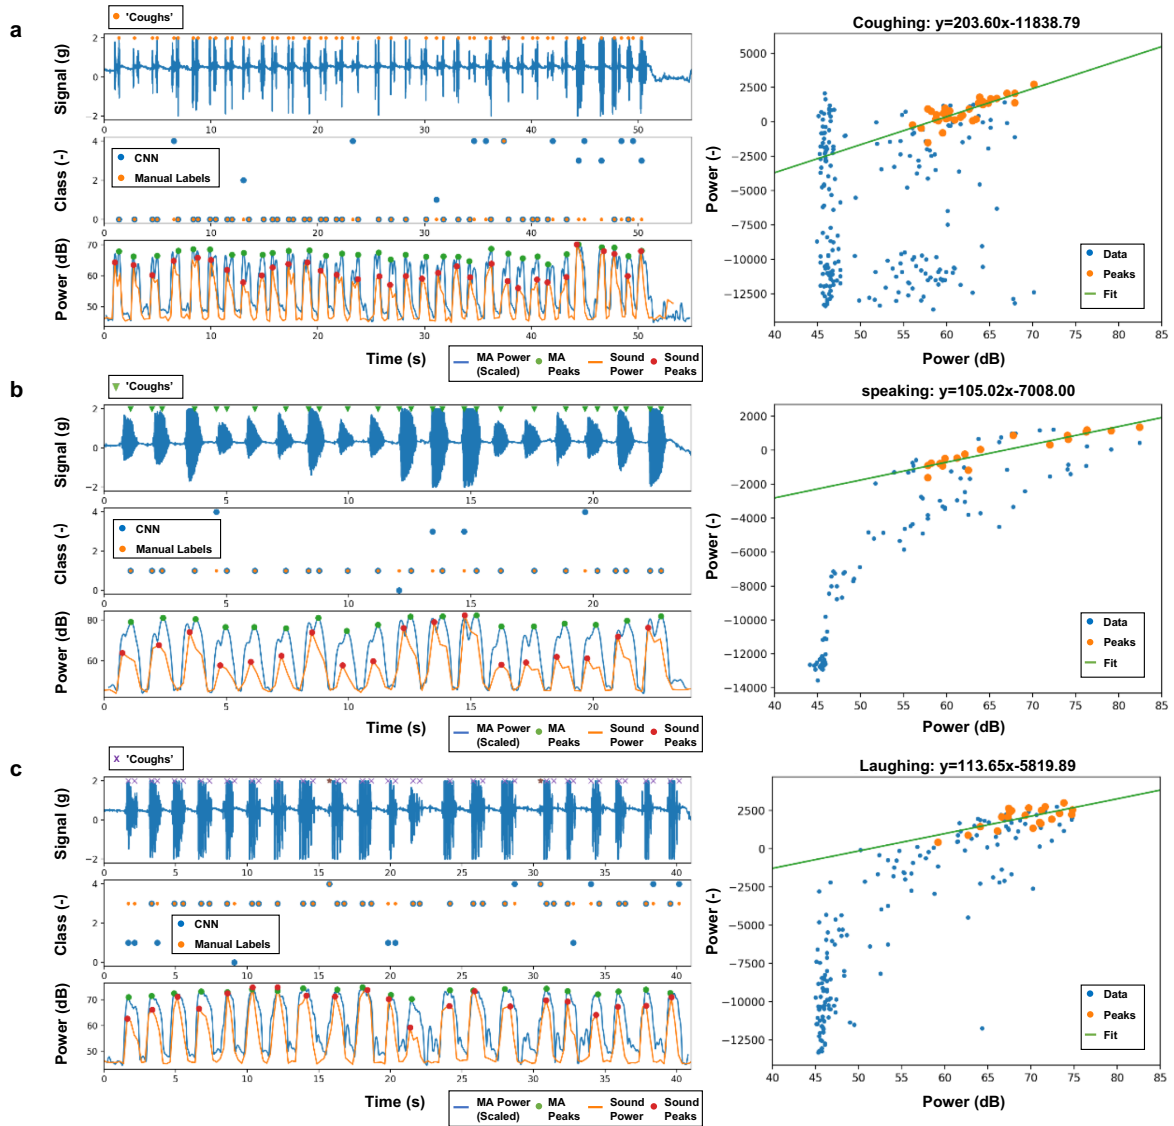

**Fig. S1.** Mechano-acoustic measurement of vocal event intensity. The time series of MA measurement, CNN-classification of the detected cough-like events in comparison with the manual labeling, and the scaled MA power synced with the decibel meter measurement of sound power for (a) coughing, (b) speaking, and (c) Laughing. Figures on the right show the correlation between MA power and sound power.

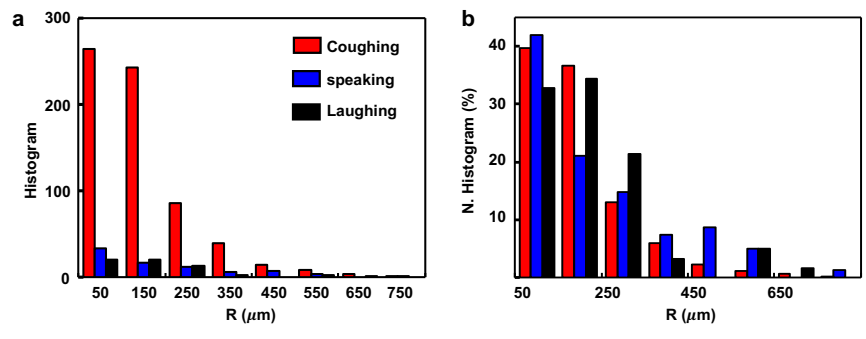

Fig. S2. Histogram of droplet sizes for coughing, speaking and laughing events. (a) Unnormalized and (b) Normalized histograms.

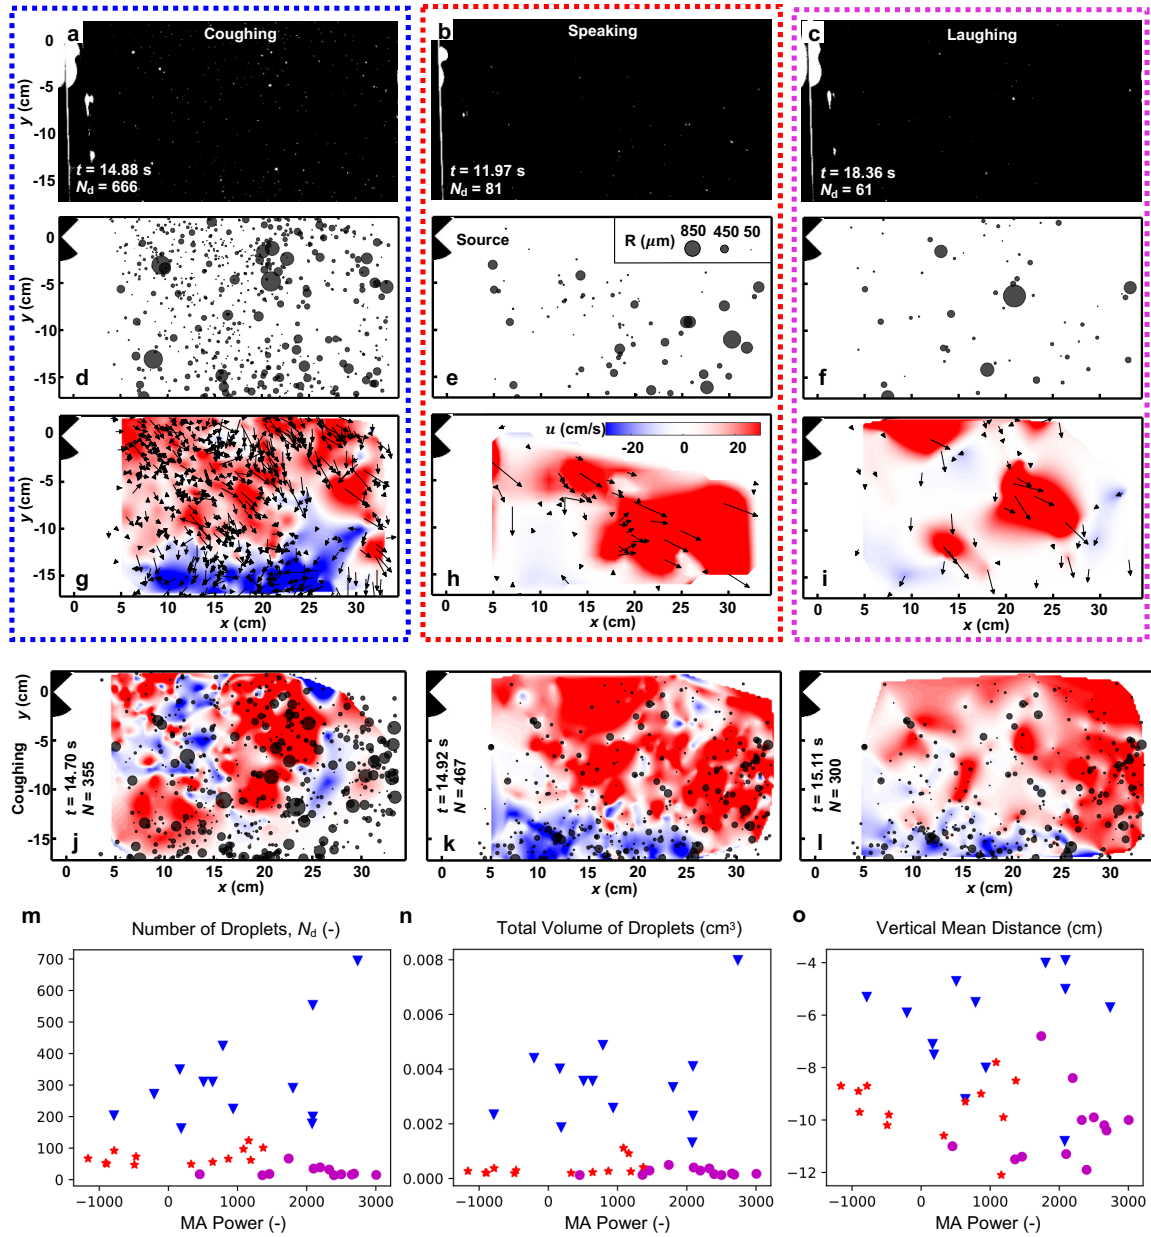

**Fig. S3.** Additional data on droplet dynamics. (a,b,c) Images of coughing, speaking, and laughing events at representative instants. (d,e,f) Detected droplets with sizes indicated by the diameters of the grey circular symbols (g,h,i) velocity vector and contour fields at the times corresponding to those in (a,b,c); the color denotes streamwise velocity. (j,k,l) Sequence of coughing at  $t=14.70\text{s}, 14.92\text{s}, 15.11\text{s}$ . (m,n,o) The total number, total volume, and vertical mean distance of produced droplets vs. MA power for coughing (blue), speaking (red), and laughing (magenta).

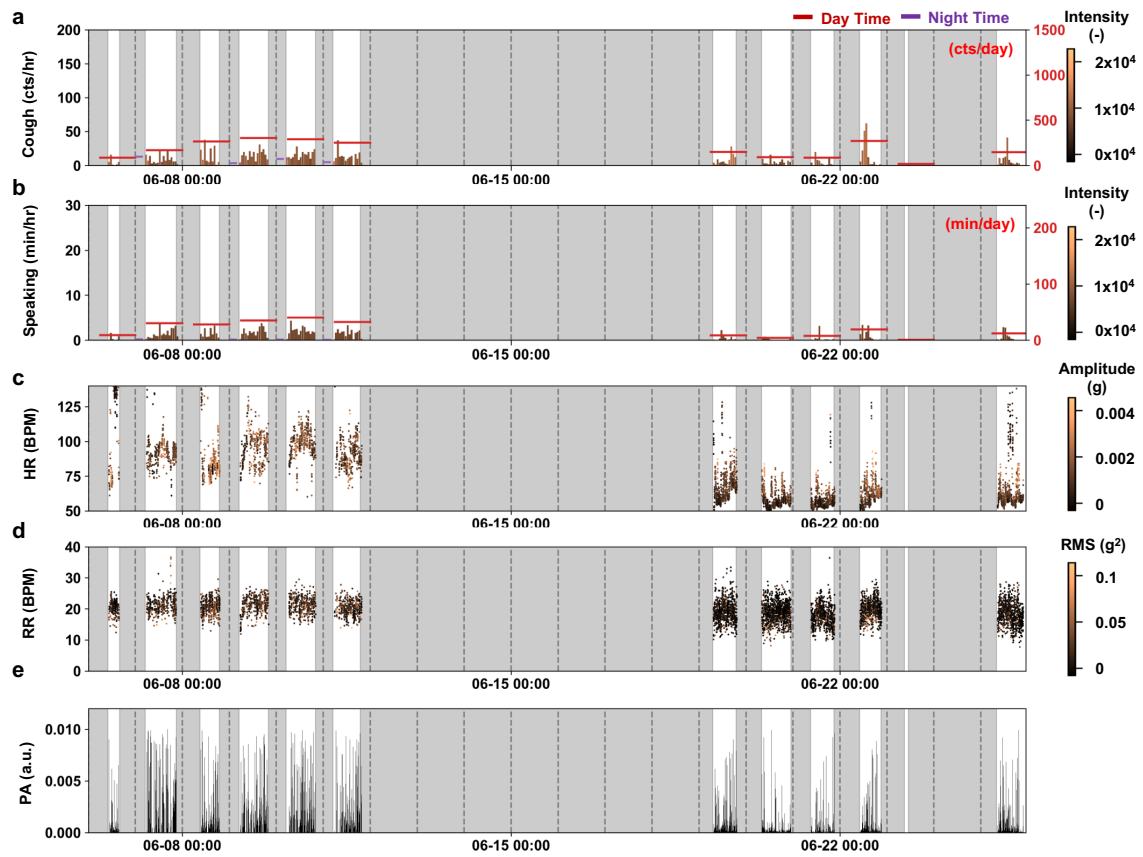

**Fig. S4.** Long-term monitoring of respiratory biomarkers and vital signs. Results for (a) coughing, (b) speaking, (c) heart rate, (d) respiration rate, and (e) physical activity of COVID-19 patient # SRALRN5F.

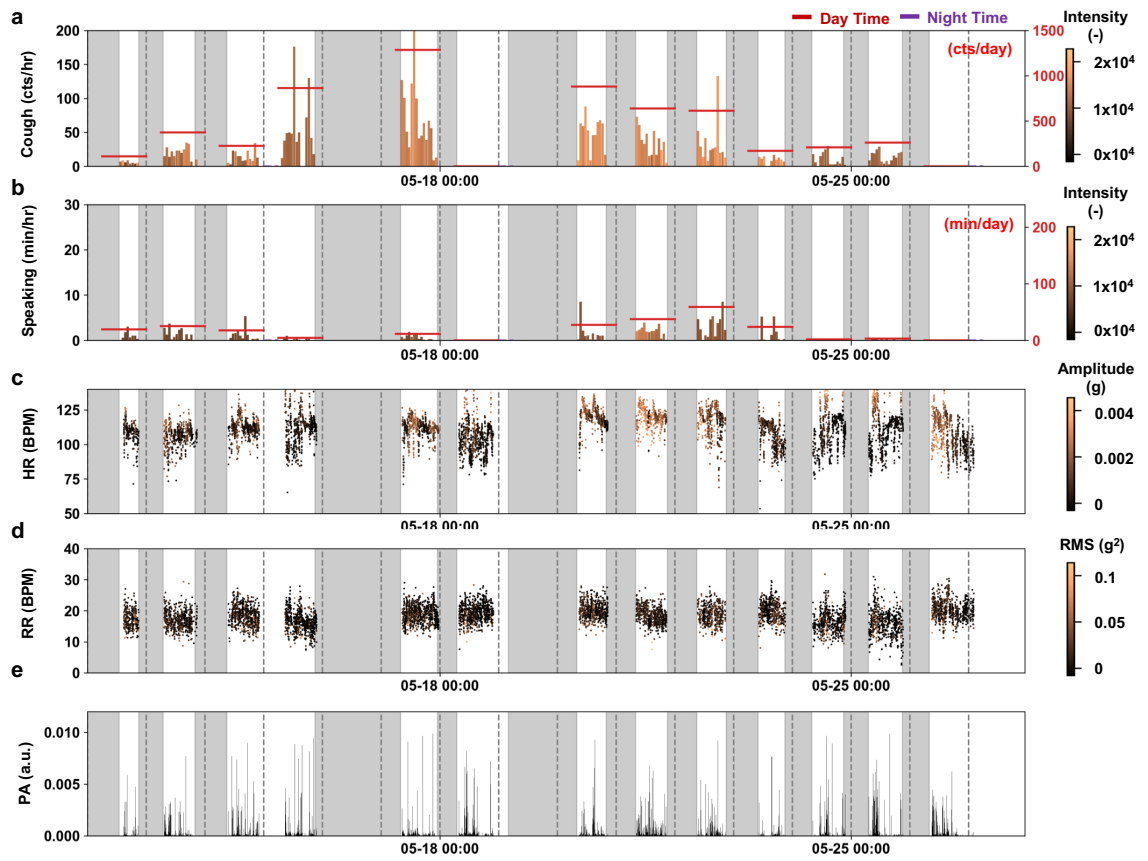

**Fig. S5.** Long-term monitoring of respiratory biomarkers and vital signs. Results for (a) coughing, (b) speaking, (c) heart rate, (d) respiration rate, and (e) physical activity of COVID-19 patient # SRAL2014F.

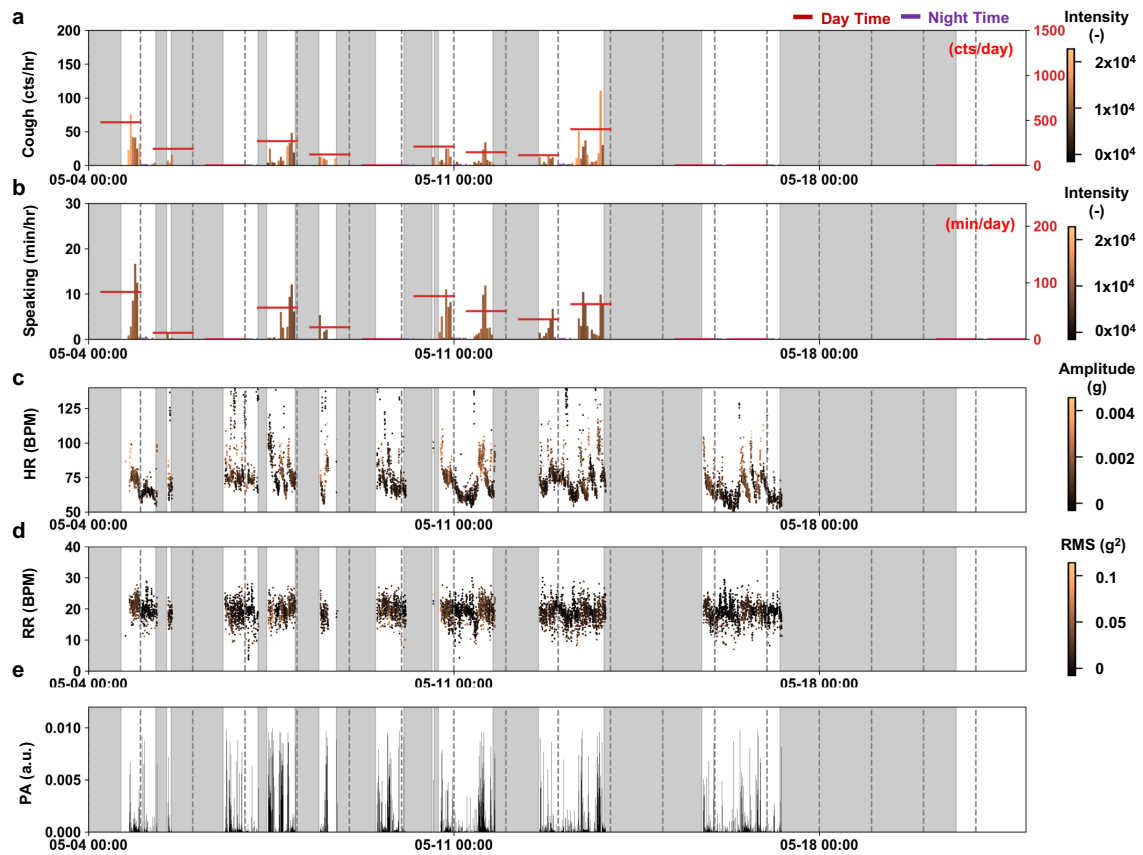

**Fig. S6.** Long-term monitoring of respiratory biomarkers and vital signs. Results for (a) coughing, (b) speaking, (c) heart rate, (d) respiration rate, and (e) physical activity of COVID-19 patient # SRALH11F.

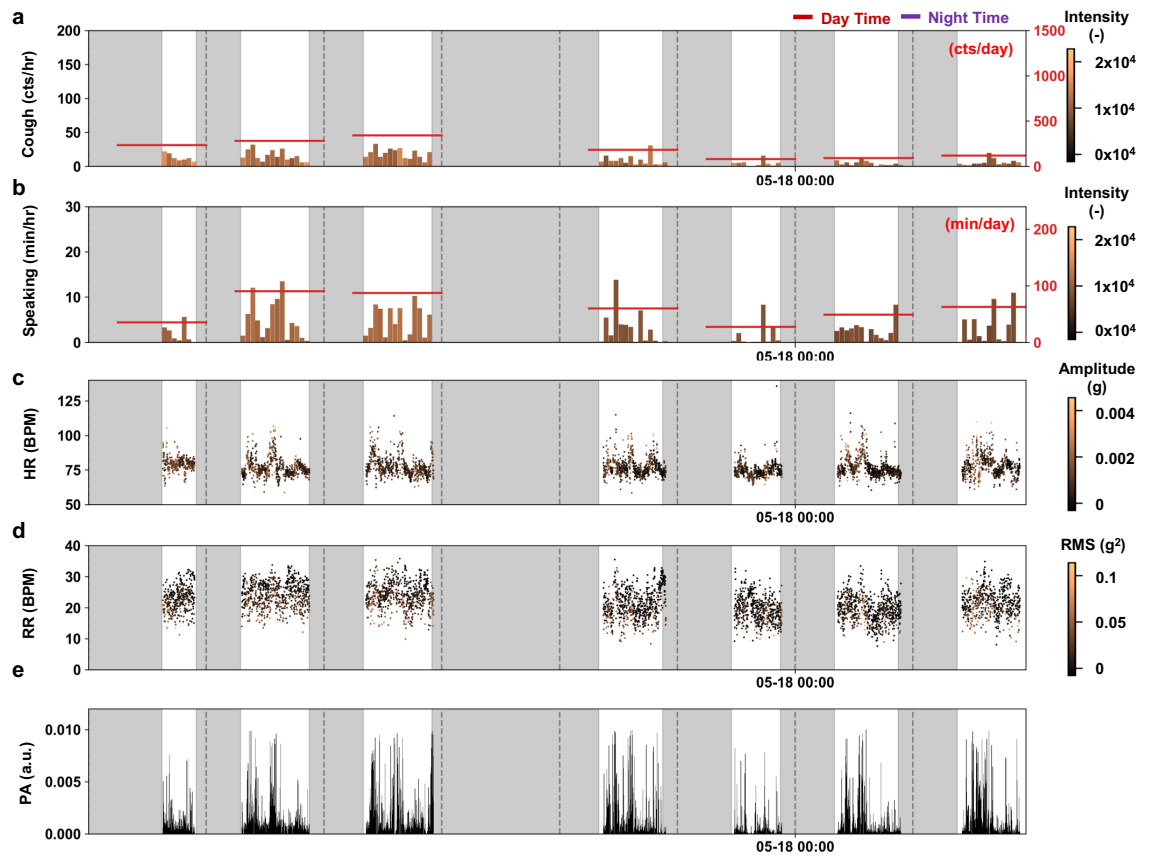

**Fig. S7.** Long-term monitoring of respiratory biomarkers and vital signs. Results for (a) coughing, (b) speaking, (c) heart rate, (d) respiration rate, and (e) physical activity of COVID-19 patient # SRAL2024M.



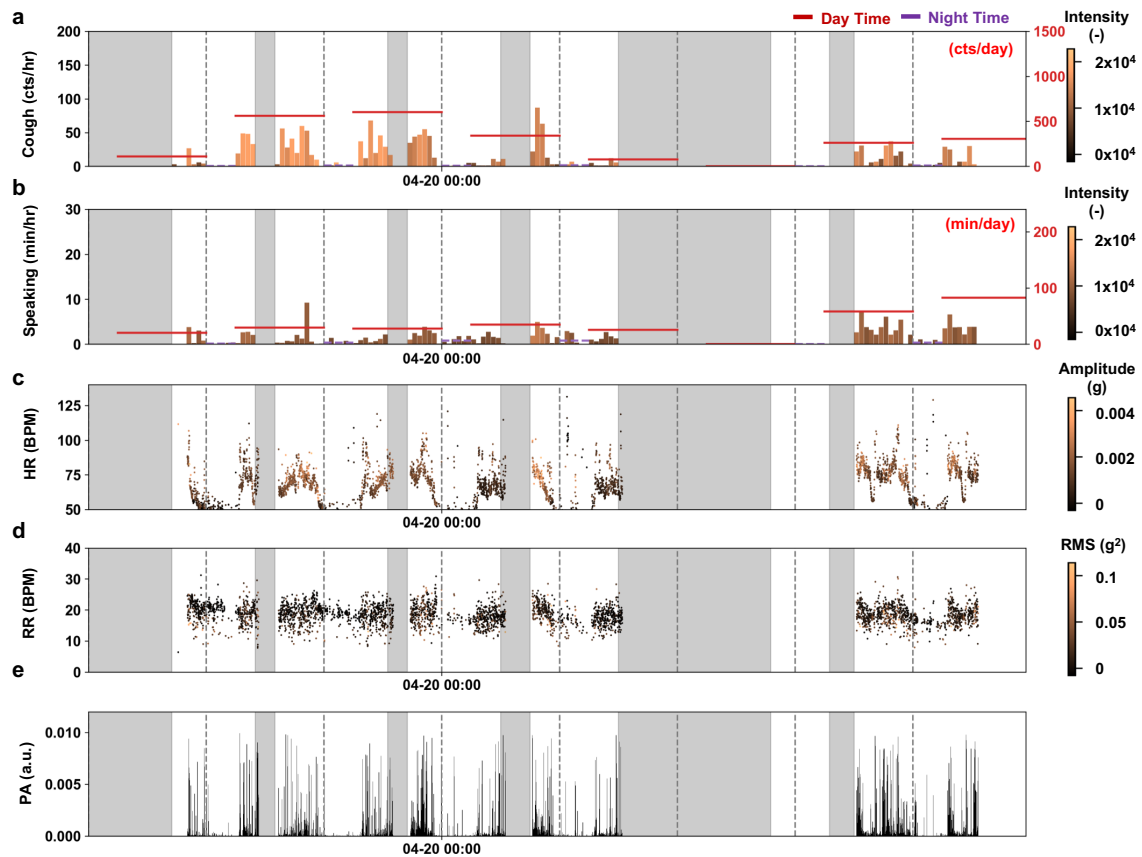

**Fig. S8.** Long-term monitoring of respiratory biomarkers and vital signs. Results for (a) coughing, (b) speaking, (c) heart rate, (d) respiration rate, and (e) physical activity of COVID-19 patient # SRAL-M-H2.

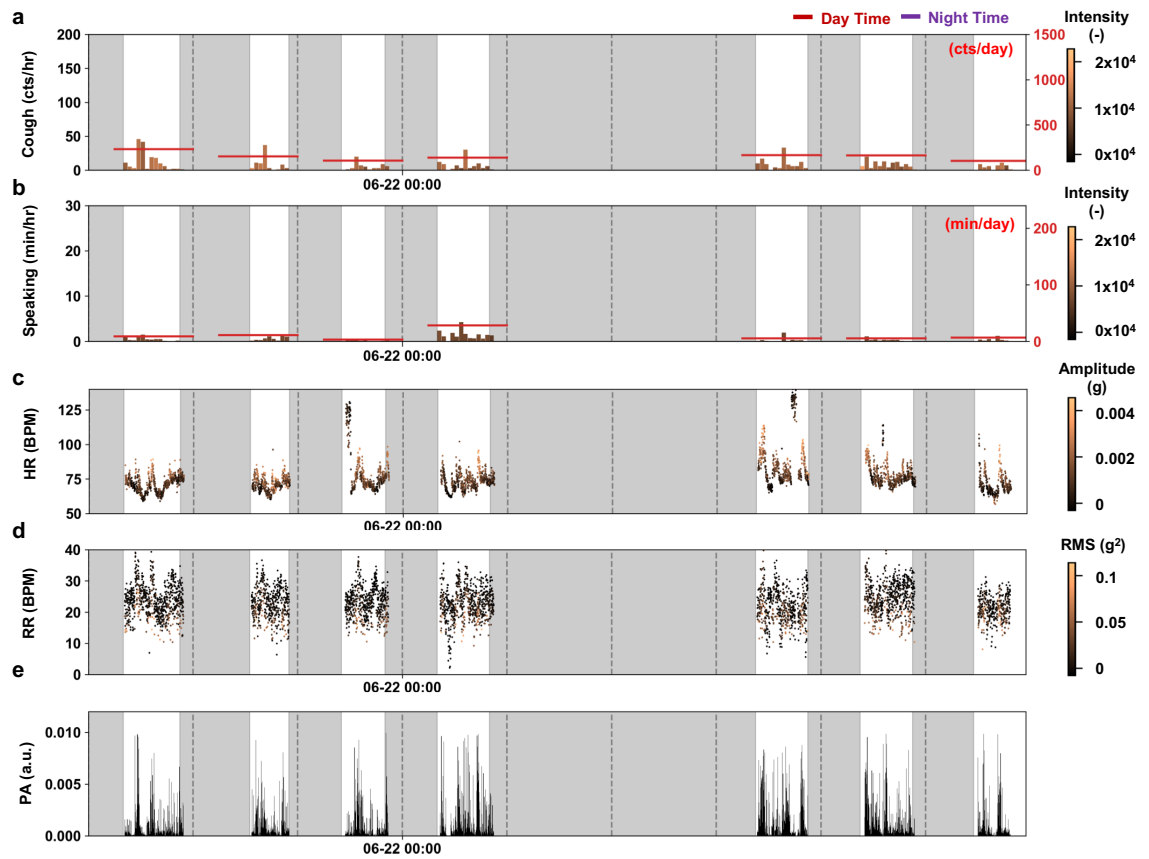

**Fig. S9.** Long-term monitoring of respiratory biomarkers and vital signs. Results for (a) coughing, (b) speaking, (c) heart rate, (d) respiration rate, and (e) physical activity of COVID-19 patient # SRAL2012BM.

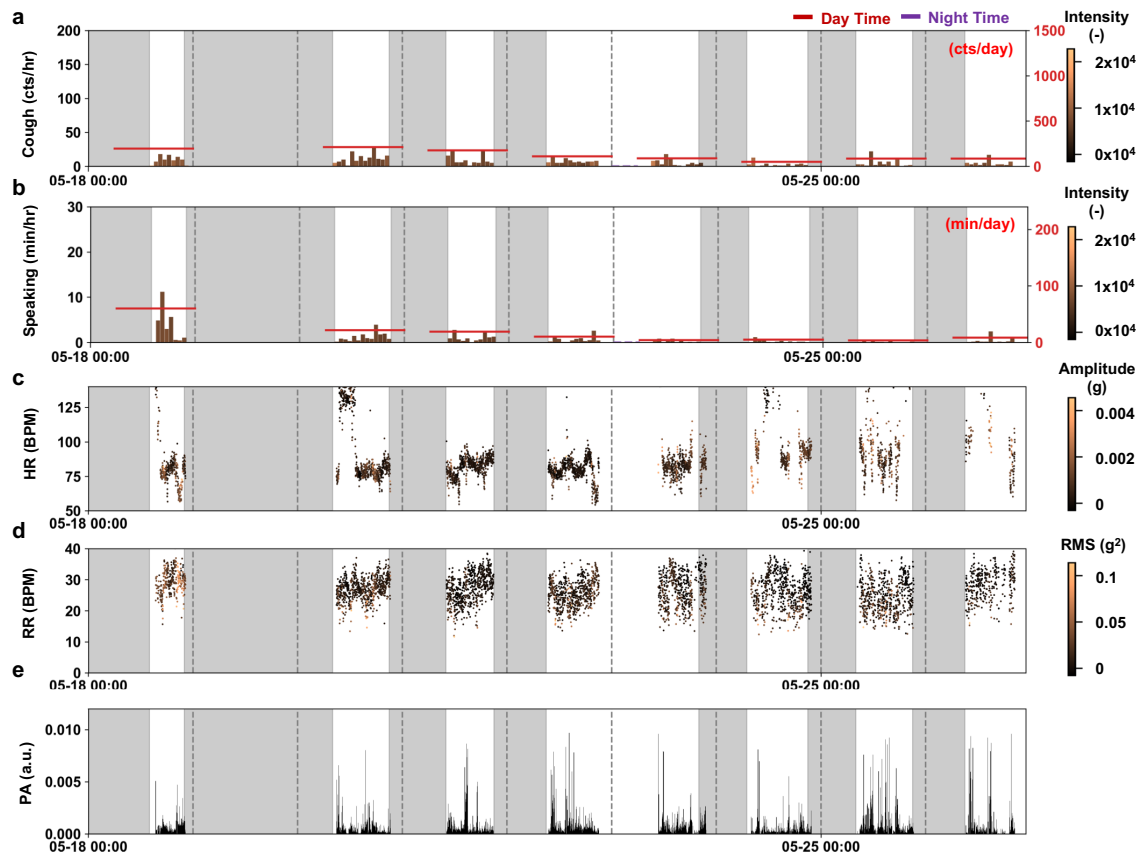

**Fig. S10.** Long-term monitoring of respiratory biomarkers and vital signs. Results for (a) coughing, (b) speaking, (c) heart rate, (d) respiration rate, and (e) physical activity of COVID-19 patient # SRAL2021F.

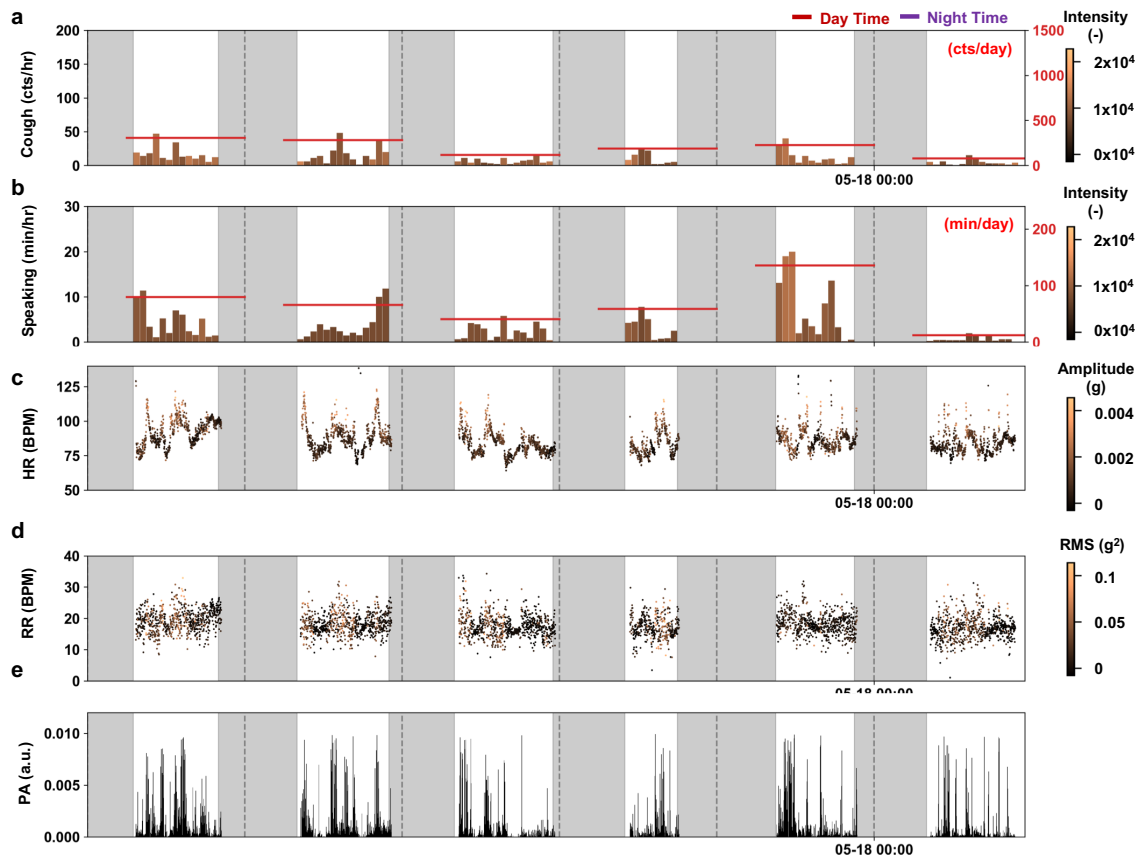

**Fig. S11.** Long-term monitoring of respiratory biomarkers and vital signs. Results for (a) coughing, (b) speaking, (c) heart rate, (d) respiration rate, and (e) physical activity of COVID-19 patient # SRAL2032F.

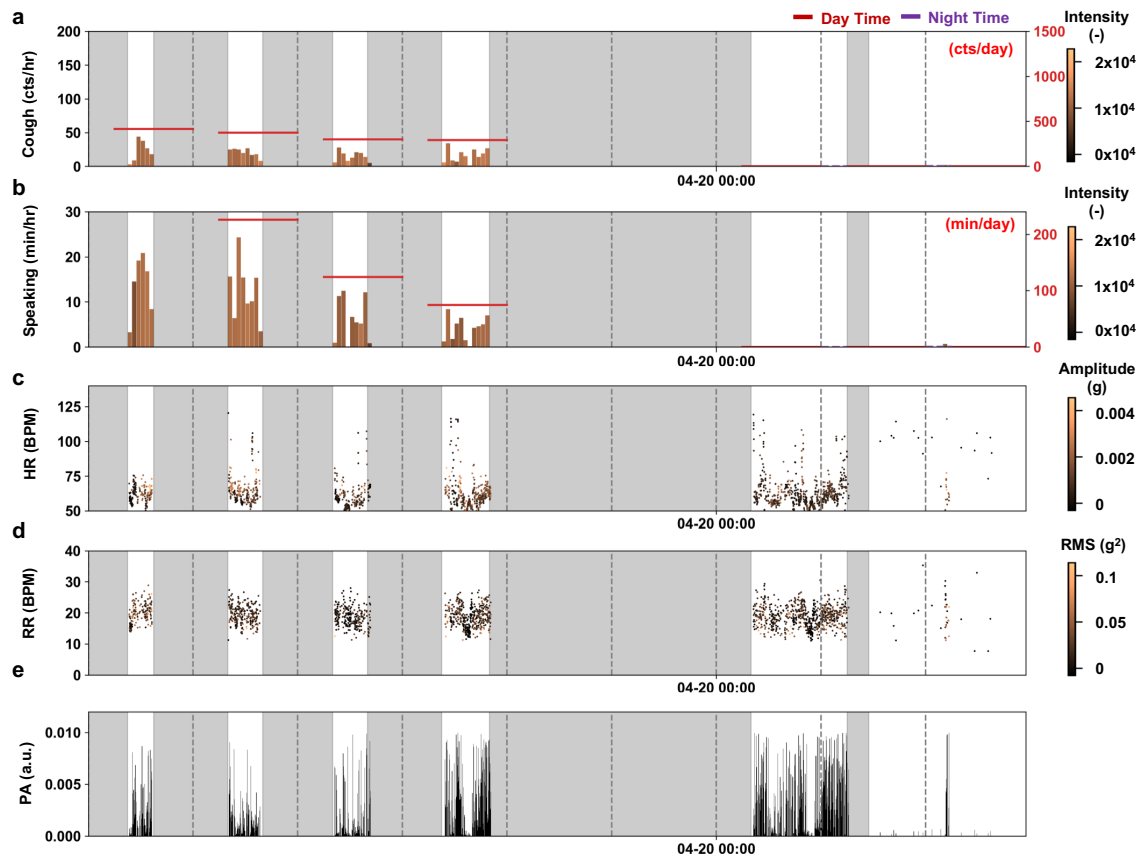

**Fig. S12.** Long-term monitoring of respiratory biomarkers and vital signs. Results for (a) coughing, (b) speaking, (c) heart rate, (d) respiration rate, and (e) physical activity of COVID-19 patient # SRAL7-M-MGR.

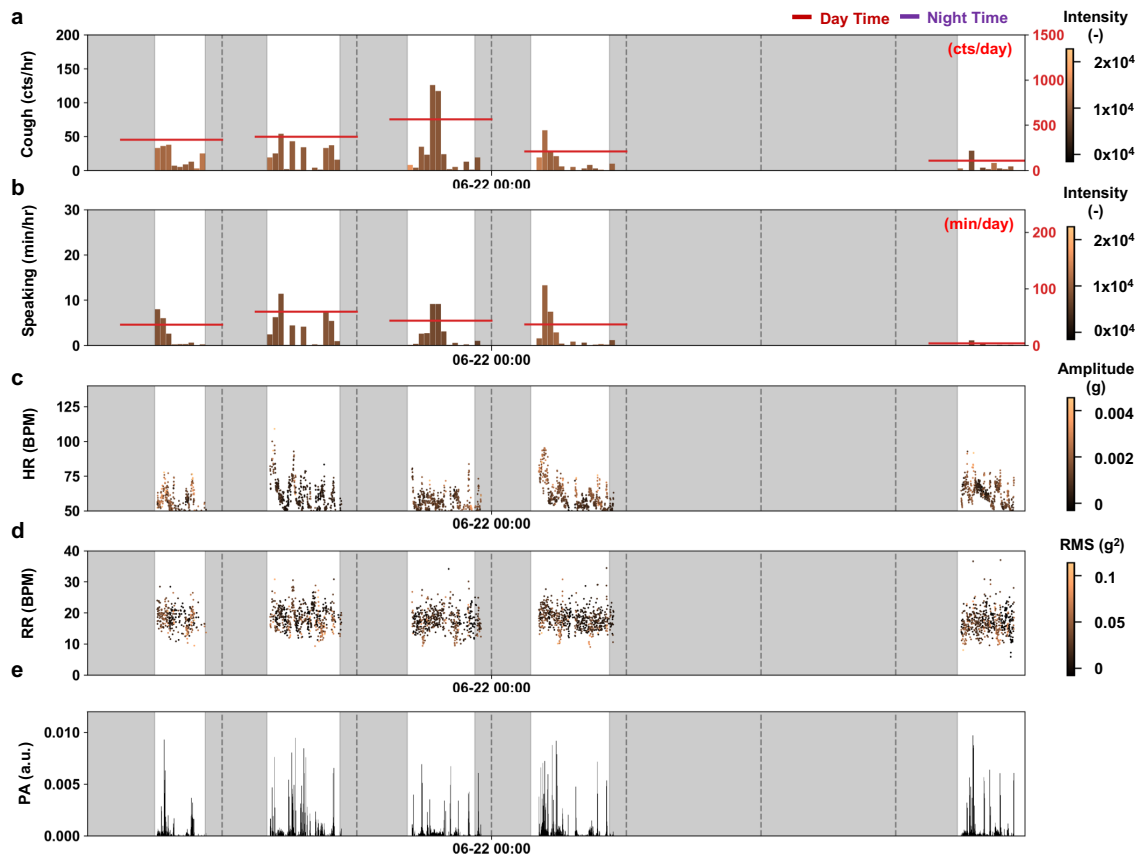

**Fig. S13.** Long-term monitoring of respiratory biomarkers and vital signs. Results for (a) coughing, (b) speaking, (c) heart rate, (d) respiration rate, and (e) physical activity of COVID-19 patient # SRAL1921F.

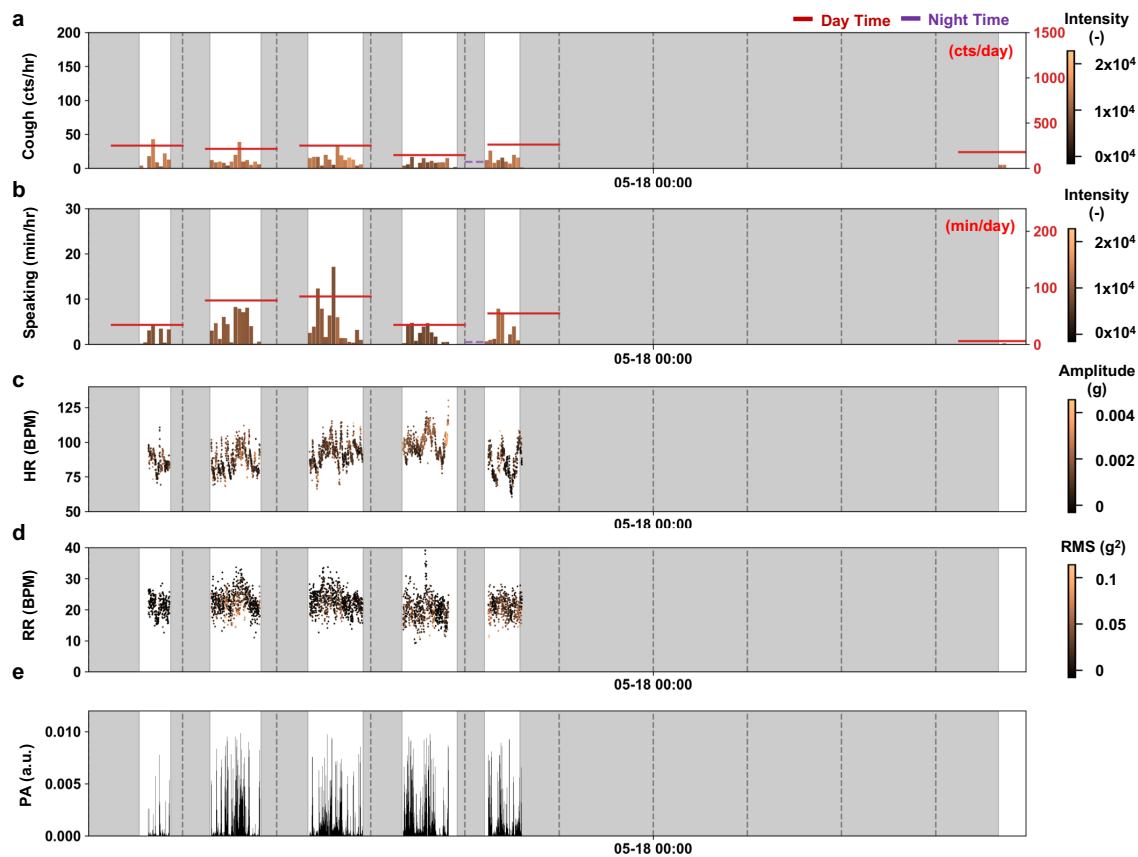

**Fig. S14.** Long-term monitoring of respiratory biomarkers and vital signs. Results for (a) coughing, (b) speaking, (c) heart rate, (d) respiration rate, and (e) physical activity of COVID-19 patient # SRAL2031M.

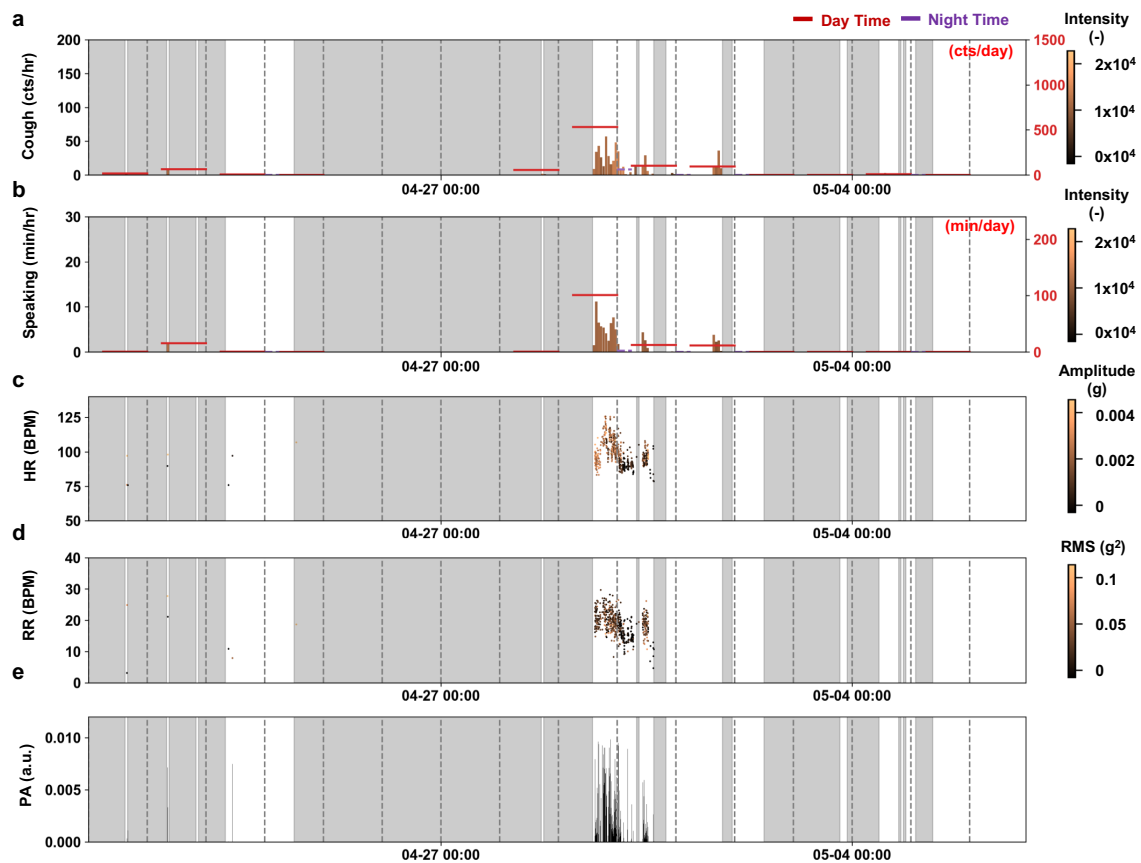

**Fig. S15.** Long-term monitoring of respiratory biomarkers and vital signs. Results for (a) coughing, (b) speaking, (c) heart rate, (d) respiration rate, and (e) physical activity of COVID-19 patient # NM12F.



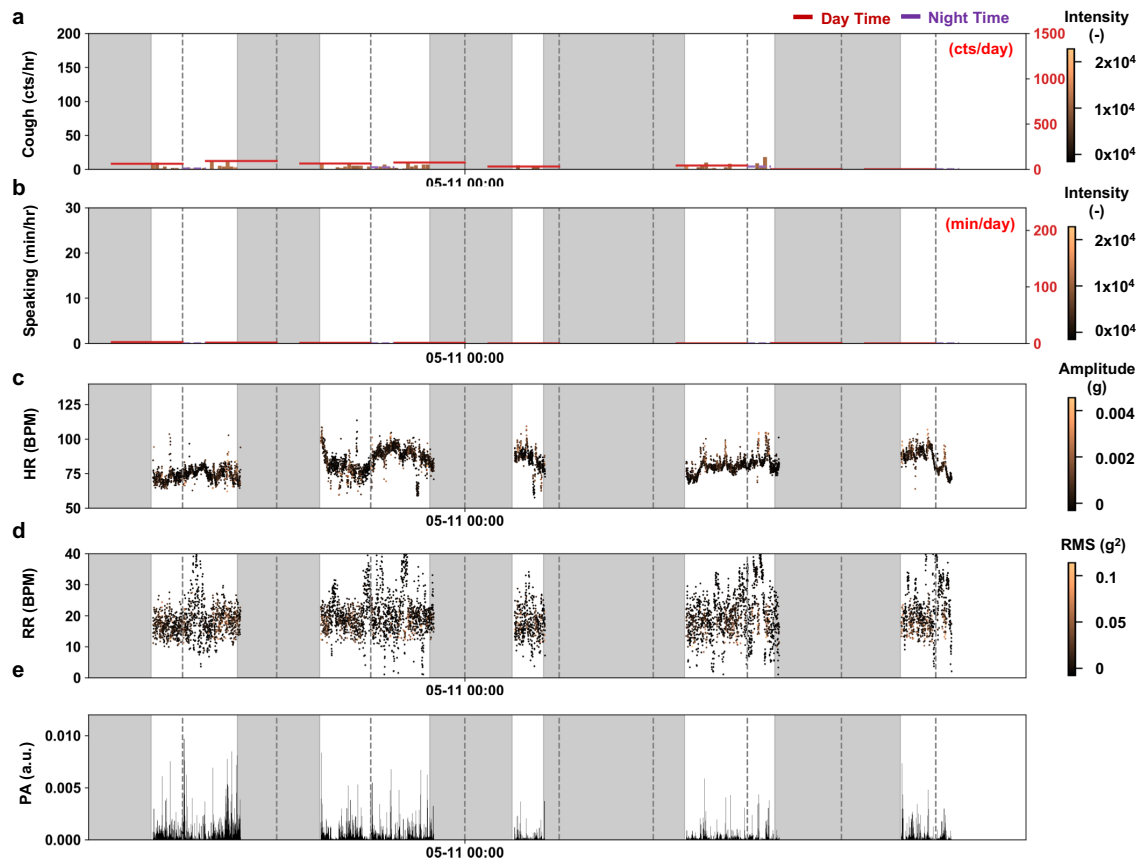

**Fig. S16.** Long-term monitoring of respiratory biomarkers and vital signs. Results for (a) coughing, (b) speaking, (c) heart rate, (d) respiration rate, and (e) physical activity of COVID-19 patient # NM17m.

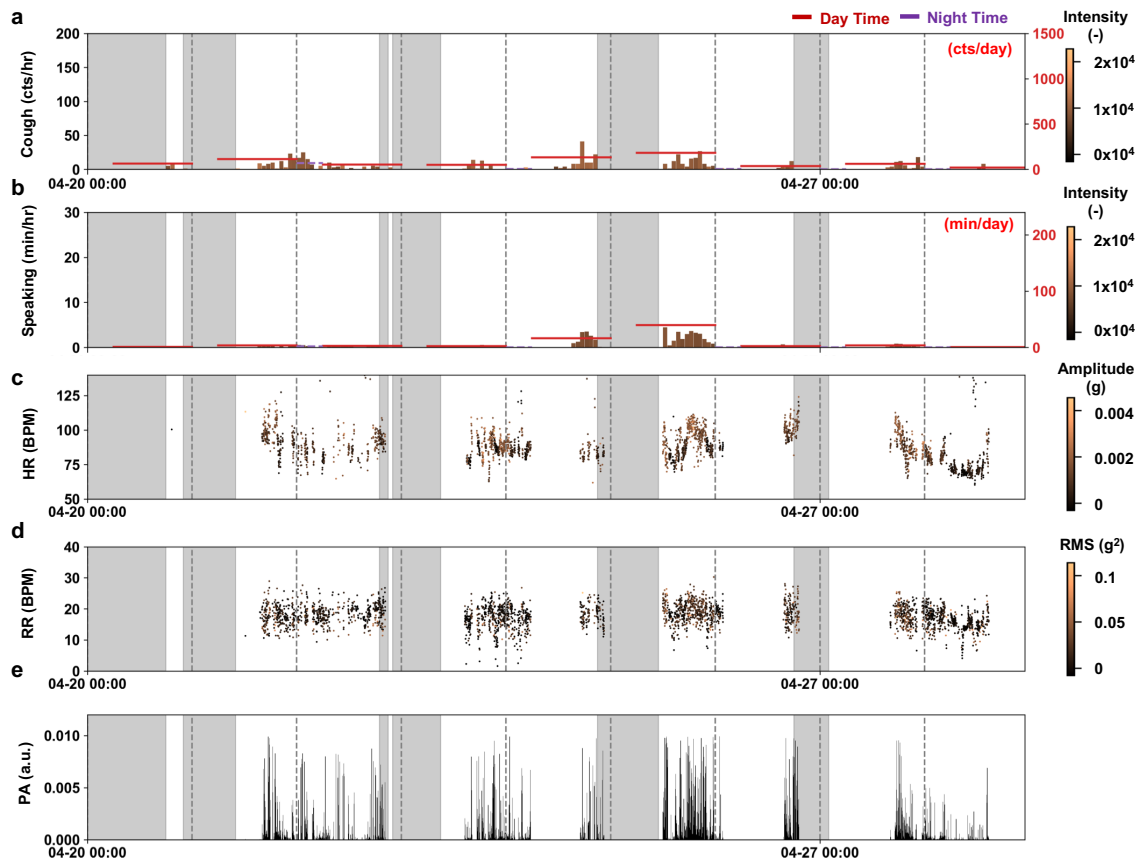

**Fig. S17.** Long-term monitoring of respiratory biomarkers and vital signs. Results for (a) coughing, (b) speaking, (c) heart rate, (d) respiration rate, and (e) physical activity of COVID-19 patient # SRAL-F-H5.

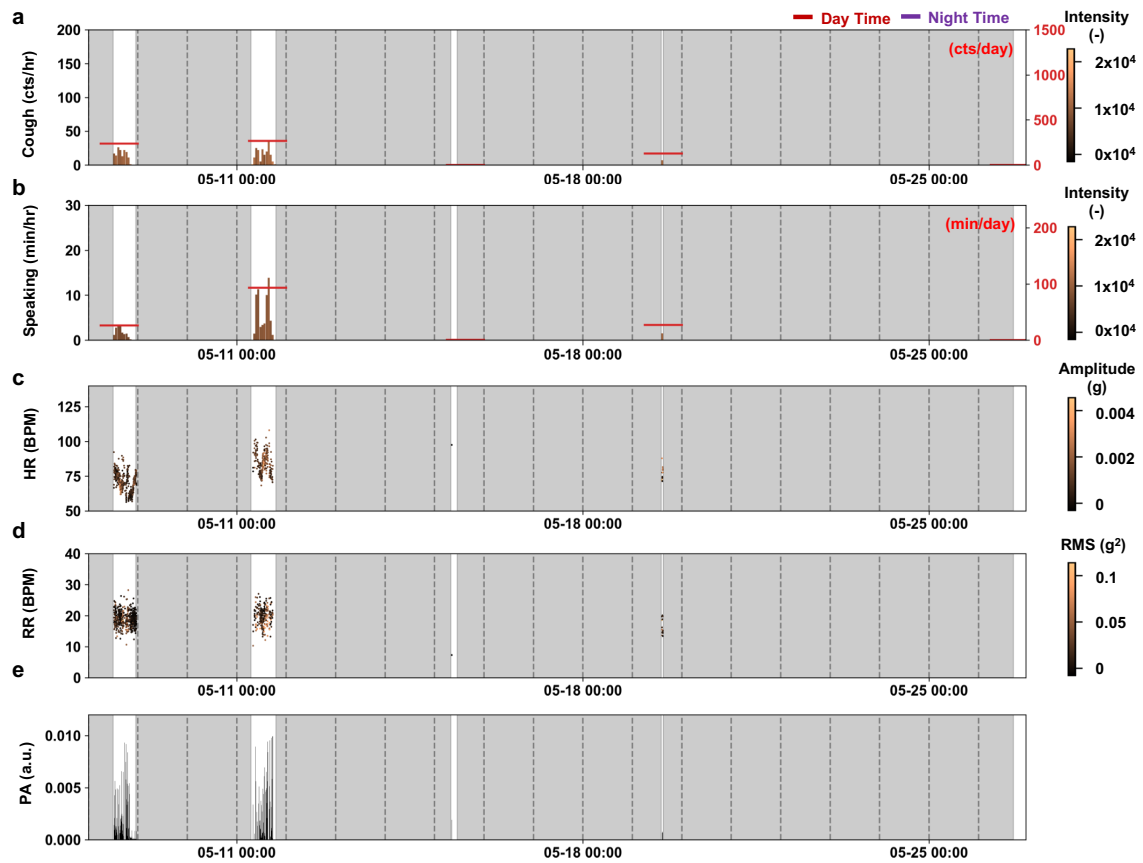

**Fig. S18.** Long-term monitoring of respiratory biomarkers and vital signs. Results for (a) coughing, (b) speaking, (c) heart rate, (d) respiration rate, and (e) physical activity of COVID-19 patient # SRALPT1F.

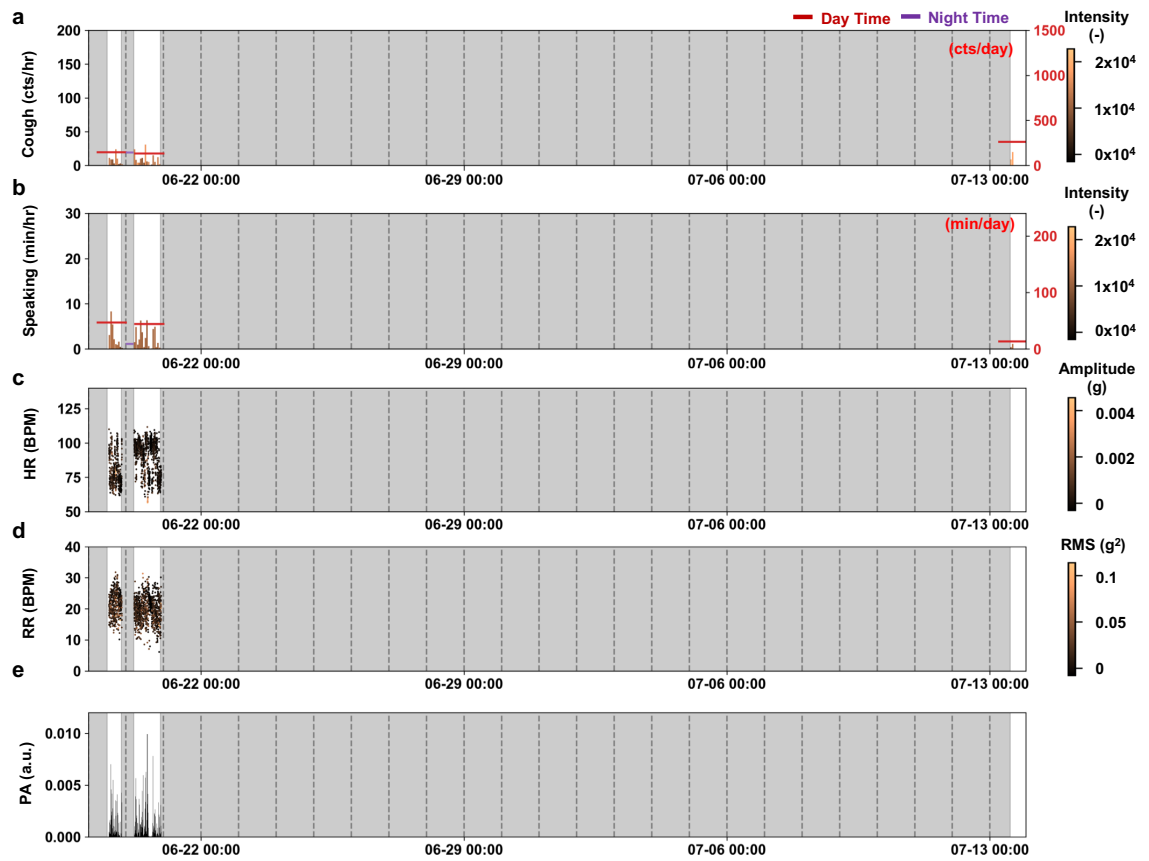

**Fig. S19.** Long-term monitoring of respiratory biomarkers and vital signs. Results for (a) coughing, (b) speaking, (c) heart rate, (d) respiration rate, and (e) physical activity of COVID-19 patient # SRAL1923M.

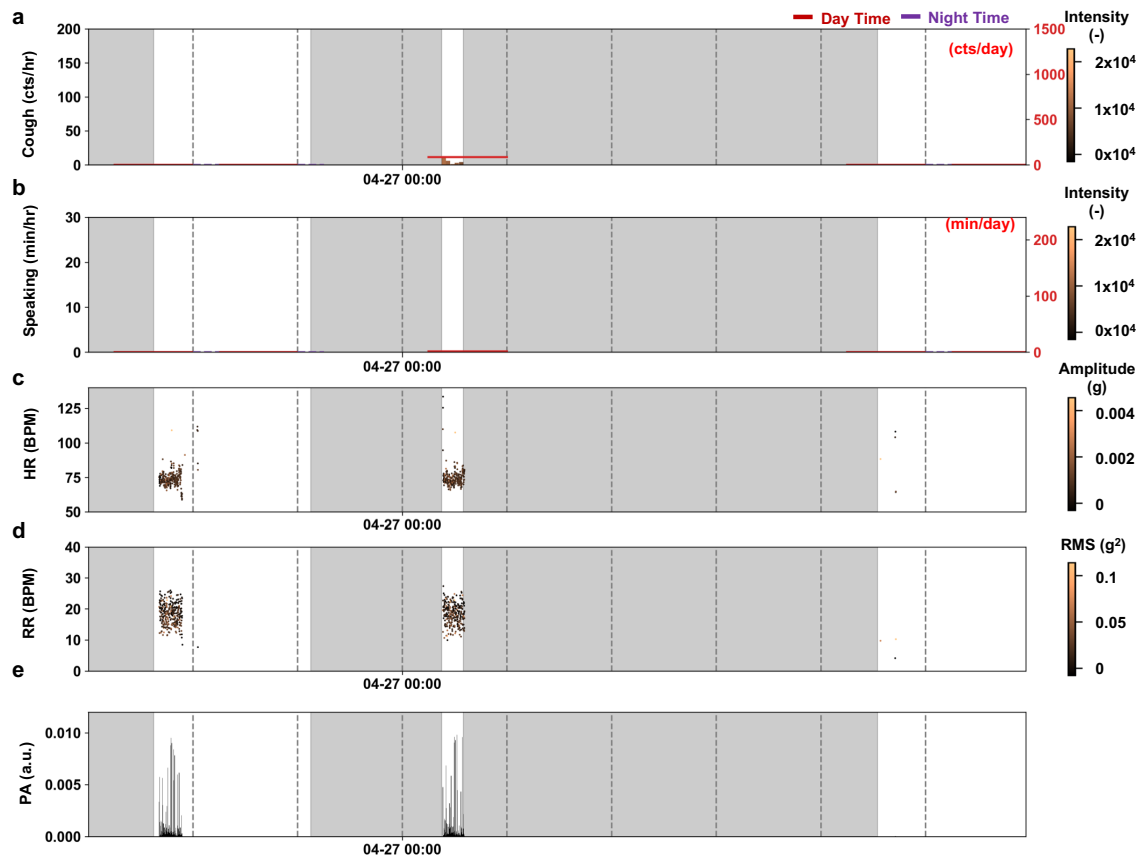

**Fig. S20.** Long-term monitoring of respiratory biomarkers and vital signs. Results for (a) coughing, (b) speaking, (c) heart rate, (d) respiration rate, and (e) physical activity of COVID-19 patient # SRALH8M.

**Table S1. Demographic information for all the participants in the study.**

| Usage    | #  | ID                | Gender | Age | Status  | Start Date | Days of Enrollment | Hours of recording | PCR+ Date |
|----------|----|-------------------|--------|-----|---------|------------|--------------------|--------------------|-----------|
| Testing  | 1  | SRAL-F-H5         | F      | 25  | Patient | 20-04-20   | 8                  | 143                | NR        |
| Testing  | 2  | SRALPT1F          | F      | 30  | Patient | 20-05-08   | 19                 | 29                 | NR        |
| Testing  | 3  | NM12F             | F      | 45  | Patient | 20-04-21   | 15                 | 114                | 20-04-18  |
| Testing  | 4  | SRALH11F          | F      | 52  | Patient | 20-05-04   | 17                 | 182                | 20-04-09  |
| Testing  | 5  | SRALDOC3F         | F      | 52  | Patient | 20-04-23   | 5                  | 16                 | NR        |
| Testing  | 6  | NM15F             | F      | 53  | Patient | 20-04-24   | 31                 | 135                | 20-04-03  |
| Testing  | 7  | SRAL2032F         | F      | 59  | Patient | 20-05-13   | 7                  | 77                 | NR        |
| Testing  | 8  | SRAL2030F         | F      | 65  | Patient | 20-05-12   | 3                  | 35                 | NR        |
| Testing  | 9  | SRAL2014F         | F      | 65  | Patient | 20-05-12   | 15                 | 188                | 20-05-03  |
| Testing  | 10 | SRAL2023F         | F      | 66  | Patient | 20-05-20   | 3                  | 42                 | NR        |
| Testing  | 11 | SRAL2022F         | F      | 69  | Patient | 20-05-13   | 6                  | 56                 | NR        |
| Testing  | 12 | SRAL2021F         | F      | 72  | Patient | 20-05-18   | 9                  | 107                | NR        |
| Testing  | 13 | SRALRN3F          | F      | NR  | Patient | 20-05-08   | 6                  | 92                 | NR        |
| Testing  | 14 | SRAL1921F         | F      | NR  | Patient | 20-06-19   | 7                  | 58                 | NR        |
| Testing  | 15 | SRALRN5F          | F      | NR  | Patient | 20-06-06   | 20                 | 142                | NR        |
| Testing  | 16 | SRAL2033M         | M      | 32  | Patient | 20-05-22   | 6                  | 59                 | NR        |
| Testing  | 17 | SRAL-M-H2         | M      | 34  | Patient | 20-04-17   | 7                  | 113                | 20-04-11  |
| Testing  | 18 | SRAL7-M-MGR       | M      | 41  | Patient | 20-04-14   | 8                  | 88                 | NR        |
| Testing  | 19 | SRALH8M           | M      | 45  | Patient | 20-04-24   | 8                  | 74                 | NR        |
| Testing  | 20 | SRAL2015M         | M      | 52  | Patient | 20-05-12   | 4                  | 44                 | NR        |
| Testing  | 21 | SRAL2024BM        | M      | 55  | Patient | 20-05-27   | 6                  | 51                 | NR        |
| Testing  | 22 | SRAL2012BM        | M      | 55  | Patient | 20-06-19   | 9                  | 77                 | NR        |
| Testing  | 23 | NM17M             | M      | 56  | Patient | 20-05-07   | 9                  | 114                | 20-05-05  |
| Testing  | 24 | SRAL2024M         | M      | 60  | Patient | 20-05-12   | 8                  | 83                 | 20-03-28  |
| Testing  | 25 | SRAL2031M         | M      | 61  | Patient | 20-05-12   | 10                 | 60                 | 20-04-21  |
| Testing  | 26 | SRAL1922M         | M      | NR  | Patient | 20-06-19   | 1                  | 6                  | NR        |
| Testing  | 27 | SRAL1923M         | M      | NR  | Patient | 20-06-19   | 25                 | 31                 | NR        |
| Training | 1  | NU-M-1            | M      | 37  | Healthy | 20-05-09   | 1                  | 5                  | NA        |
| Training | 2  | NU-M-2            | M      | 53  | Healthy | 20-05-02   | 1                  | 5                  | NA        |
| Training | 3  | NU-M-3            | M      | 29  | Healthy | 20-05-09   | 1                  | 6                  | NA        |
| Training | 4  | NU-F-1            | F      | 26  | Healthy | 20-05-13   | 1                  | 8                  | NA        |
| Training | 5  | NU-M-4            | M      | 30  | Healthy | 20-05-11   | 1                  | 24                 | NA        |
| Training | 6  | NU-F-2            | F      | 29  | Healthy | 20-05-13   | 1                  | 23                 | NA        |
| Training | 7  | NU-F-3            | F      | 29  | Healthy | 20-05-15   | 1                  | 22                 | NA        |
| Training | 8  | NU-M-5            | M      | 40  | Healthy | 20-05-15   | 1                  | 18                 | NA        |
| Training | 9  | NU-F-4            | F      | 27  | Healthy | 20-05-16   | 2                  | 19                 | NA        |
| Training | 10 | NU-M-6            | M      | 25  | Healthy | 20-06-10   | 1                  | 2                  | NA        |
| Training | 11 | SRAL-F-H1         | F      | 31  | Patient | 20-04-17   | 10                 | 115                | NR        |
| Training | 12 | SRAL-F-H4         | F      | 21  | Patient | 20-04-21   | 9                  | 142                | NR        |
| Training | 13 | SRAL-F-H6         | F      | 48  | Patient | 20-04-21   | 9                  | 113                | NR        |
| Training | 14 | SRAL-M-H3         | M      | 59  | Patient | 20-04-17   | 13                 | 171                | NR        |
| Training | 15 | SRAL2020BF        | F      | 64  | Patient | 20-05-29   | 13                 | 38                 | NR        |
| Training | 16 | SRAL2025M         | M      | 75  | Patient | 20-05-19   | 8                  | 101                | NR        |
| Training | 17 | SRAL2026F         | F      | 68  | Patient | 20-05-21   | 4                  | 58                 | NR        |
| Training | 18 | SRAL2032BM        | M      | 52  | Patient | 20-05-29   | 7                  | 60                 | NR        |
| Training | 19 | SRAL2019M         | M      | 60  | Patient | 20-06-05   | 10                 | 38                 | NR        |
| Training | 20 | SRAL2006M         | M      | 59  | Patient | 20-06-19   | 8                  | 59                 | NR        |
| Note:    |    |                   |        |     |         |            |                    |                    |           |
|          |    | NR = Not Reported |        |     |         |            |                    |                    |           |
|          |    | NA=Not Applicable |        |     |         |            |                    |                    |           |

Table S2. Detailed statistical information of the performance of the CNN model on subjects.

| Usage    | #  | ID          | Cough               |       |       |       | Speak               |       |       |       | Throat clearing     |       |       |       | Laugh               |       |       |       | Motion artifact     |       |       |       |
|----------|----|-------------|---------------------|-------|-------|-------|---------------------|-------|-------|-------|---------------------|-------|-------|-------|---------------------|-------|-------|-------|---------------------|-------|-------|-------|
|          |    |             | Labeled # of events | sens. | spec. | prec. | Labeled # of events | sens. | spec. | prec. | Labeled # of events | sens. | spec. | prec. | Labeled # of events | sens. | spec. | prec. | Labeled # of events | sens. | spec. | prec. |
| Testing  | 1  | SRAL-F-H5   |                     |       |       |       |                     |       |       |       |                     |       |       |       |                     |       |       |       |                     |       |       |       |
| Testing  | 2  | SRALPT1F    |                     |       |       |       |                     |       |       |       |                     |       |       |       |                     |       |       |       |                     |       |       |       |
| Testing  | 3  | NM12F       |                     |       |       |       |                     |       |       |       |                     |       |       |       |                     |       |       |       |                     |       |       |       |
| Testing  | 4  | SRALH11F    | 185                 | 0.98  | 0.86  | 0.71  | 182                 | 0.64  | 1.00  | 1.00  | 62                  | 0.92  | 0.97  | 0.74  | 95                  | 0.54  | 0.97  | 0.73  | 183                 | 0.97  | 0.98  | 0.94  |
| Testing  | 5  | SRALDOC3F   |                     |       |       |       |                     |       |       |       |                     |       |       |       |                     |       |       |       |                     |       |       |       |
| Testing  | 6  | NM15F       | 292                 | 0.97  | 0.98  | 0.95  | 291                 | 0.96  | 1.00  | 1.00  | 51                  | 0.98  | 1.00  | 1.00  | 51                  | 0.80  | 0.99  | 0.84  | 291                 | 1.00  | 0.99  | 0.97  |
| Testing  | 7  | SRAL2032F   | 384                 | 0.76  | 0.96  | 0.88  | 381                 | 0.47  | 0.98  | 0.90  | 119                 | 0.89  | 0.89  | 0.43  | 145                 | 0.84  | 0.91  | 0.50  | 382                 | 0.88  | 0.95  | 0.86  |
| Testing  | 8  | SRAL2030F   |                     |       |       |       |                     |       |       |       |                     |       |       |       |                     |       |       |       |                     |       |       |       |
| Testing  | 9  | SRAL2014F   | 406                 | 0.78  | 0.98  | 0.95  | 404                 | 0.74  | 0.98  | 0.96  | 62                  | 0.94  | 0.94  | 0.44  | 13                  | 0.92  | 0.94  | 0.14  | 404                 | 0.91  | 0.94  | 0.87  |
| Testing  | 10 | SRAL2023F   |                     |       |       |       |                     |       |       |       |                     |       |       |       |                     |       |       |       |                     |       |       |       |
| Testing  | 11 | SRAL2022F   |                     |       |       |       |                     |       |       |       |                     |       |       |       |                     |       |       |       |                     |       |       |       |
| Testing  | 12 | SRAL2021F   | 410                 | 0.69  | 0.98  | 0.93  | 407                 | 0.78  | 0.99  | 0.96  | 184                 | 0.97  | 0.90  | 0.59  | 11                  | 0.73  | 1.00  | 0.57  | 408                 | 1.00  | 0.94  | 0.86  |
| Testing  | 13 | SRALRN3F    |                     |       |       |       |                     |       |       |       |                     |       |       |       |                     |       |       |       |                     |       |       |       |
| Testing  | 14 | SRAL1921F   | 232                 | 1.00  | 0.95  | 0.87  | 229                 | 0.93  | 1.00  | 1.00  | 99                  | 1.00  | 1.00  | 1.00  | 117                 | 0.69  | 0.98  | 0.86  | 232                 | 1.00  | 0.99  | 0.98  |
| Testing  | 15 | SRALRN5F    |                     |       |       |       |                     |       |       |       |                     |       |       |       |                     |       |       |       |                     |       |       |       |
| Testing  | 16 | SRAL2033M   |                     |       |       |       |                     |       |       |       |                     |       |       |       |                     |       |       |       |                     |       |       |       |
| Testing  | 17 | SRAL-M-H2   | 301                 | 0.99  | 1.00  | 0.99  | 298                 | 0.97  | 1.00  | 1.00  | 101                 | 0.98  | 1.00  | 0.99  | 86                  | 0.99  | 0.99  | 0.86  | 300                 | 0.99  | 1.00  | 1.00  |
| Testing  | 18 | SRAL7-M-MGR | 180                 | 0.71  | 0.89  | 0.62  | 177                 | 0.47  | 0.89  | 0.52  | 179                 | 0.55  | 0.92  | 0.64  | 178                 | 0.51  | 0.92  | 0.62  | 177                 | 0.75  | 0.87  | 0.59  |
| Testing  | 19 | SRALH8M     |                     |       |       |       |                     |       |       |       |                     |       |       |       |                     |       |       |       |                     |       |       |       |
| Testing  | 20 | SRAL2015M   |                     |       |       |       |                     |       |       |       |                     |       |       |       |                     |       |       |       |                     |       |       |       |
| Testing  | 21 | SRAL2024BM  |                     |       |       |       |                     |       |       |       |                     |       |       |       |                     |       |       |       |                     |       |       |       |
| Testing  | 22 | SRAL2012BM  | 287                 | 0.94  | 0.97  | 0.92  | 284                 | 0.64  | 0.98  | 0.93  | 249                 | 0.90  | 0.94  | 0.82  | 12                  | 0.92  | 0.96  | 0.19  | 285                 | 0.93  | 0.96  | 0.90  |
| Testing  | 23 | NM17M       |                     |       |       |       |                     |       |       |       |                     |       |       |       |                     |       |       |       |                     |       |       |       |
| Testing  | 24 | SRAL2024M   | 108                 | 0.86  | 0.88  | 0.69  | 105                 | 0.50  | 0.99  | 0.91  | 106                 | 0.77  | 0.91  | 0.73  | 27                  | 0.93  | 0.94  | 0.51  | 106                 | 0.88  | 0.99  | 0.95  |
| Testing  | 25 | SRAL2031M   |                     |       |       |       |                     |       |       |       |                     |       |       |       |                     |       |       |       |                     |       |       |       |
| Testing  | 26 | SRAL1922M   |                     |       |       |       |                     |       |       |       |                     |       |       |       |                     |       |       |       |                     |       |       |       |
| Testing  | 27 | SRAL1923M   |                     |       |       |       |                     |       |       |       |                     |       |       |       |                     |       |       |       |                     |       |       |       |
| Training | 1  | NU-M-1      | 126                 | 1.00  | 0.99  | 0.97  | 221                 | 0.98  | 0.99  | 0.97  | 124                 | 0.88  | 0.99  | 0.96  | 146                 | 0.99  | 0.99  | 0.95  | 157                 | 0.99  | 1.00  | 1.00  |
| Training | 2  | NU-M-2      | 184                 | 0.96  | 0.98  | 0.90  | 123                 | 0.97  | 0.96  | 0.77  | 179                 | 0.74  | 0.99  | 0.96  | 206                 | 0.88  | 0.98  | 0.91  | 304                 | 1.00  | 0.99  | 0.98  |
| Training | 3  | NU-M-3      | 143                 | 1.00  | 0.99  | 0.92  | 291                 | 0.89  | 0.96  | 0.90  | 133                 | 0.92  | 0.98  | 0.87  | 177                 | 0.82  | 0.99  | 0.92  | 277                 | 0.99  | 1.00  | 0.99  |
| Training | 4  | NU-F-1      | 104                 | 0.95  | 1.00  | 1.00  | 117                 | 0.99  | 0.89  | 0.65  | 96                  | 0.51  | 0.99  | 0.89  | 77                  | 0.78  | 1.00  | 1.00  | 309                 | 0.99  | 0.99  | 0.99  |
| Training | 5  | NU-M-4      | 120                 | 0.78  | 0.99  | 0.96  | 89                  | 0.63  | 1.00  | 0.97  | 215                 | 0.94  | 0.98  | 0.95  | 28                  | 0.89  | 0.96  | 0.47  | 321                 | 1.00  | 0.93  | 0.91  |
| Training | 6  | NU-F-2      | 128                 | 0.98  | 0.99  | 0.95  | 0                   | nan   | 0.99  | 0.29  | 155                 | 0.98  | 0.99  | 0.97  | 103                 | 0.87  | 1.00  | 1.00  | 315                 | 1.00  | 0.99  | 0.99  |
| Training | 7  | NU-F-3      | 98                  | 0.87  | 1.00  | 0.99  | 179                 | 0.92  | 0.97  | 0.89  | 0                   | nan   | 0.98  | 0.00  | 214                 | 0.87  | 0.97  | 0.92  | 289                 | 1.00  | 1.00  | 1.00  |
| Training | 8  | NU-M-5      | 146                 | 0.97  | 0.97  | 0.91  | 28                  | 0.71  | 0.96  | 0.45  | 169                 | 0.76  | 0.98  | 0.93  | 32                  | 0.91  | 0.98  | 0.73  | 301                 | 0.99  | 0.99  | 0.99  |
| Training | 9  | NU-F-4      | 217                 | 0.98  | 0.98  | 0.93  | 236                 | 0.88  | 0.96  | 0.86  | 211                 | 0.96  | 0.98  | 0.90  | 224                 | 0.78  | 0.99  | 0.94  | 293                 | 1.00  | 0.99  | 0.98  |
| Training | 10 | NU-M-6      | 113                 | 0.92  | 0.94  | 0.70  | 157                 | 1.00  | 0.96  | 0.85  | 141                 | 0.64  | 1.00  | 0.99  | 106                 | 0.77  | 0.99  | 0.92  | 324                 | 1.00  | 0.99  | 0.99  |
| Training | 11 | SRAL-F-H1   | 166                 | 0.85  | 0.99  | 0.97  | 169                 | 0.88  | 0.98  | 0.94  | 39                  | 0.67  | 0.97  | 0.58  | 29                  | 0.76  | 0.97  | 0.58  | 250                 | 0.99  | 0.95  | 0.93  |
| Training | 12 | SRAL-F-H4   | 114                 | 0.86  | 0.92  | 0.70  | 42                  | 0.81  | 0.98  | 0.69  | 0                   | nan   | 0.98  | 0.00  | 87                  | 0.36  | 1.00  | 1.00  | 416                 | 0.97  | 0.90  | 0.94  |
| Training | 13 | SRAL-F-H6   | 114                 | 0.88  | 0.98  | 0.89  | 166                 | 0.84  | 1.00  | 1.00  | 0                   | nan   | 0.99  | 0.00  | 0                   | nan   | 0.98  | 0.00  | 443                 | 0.97  | 0.93  | 0.96  |
| Training | 14 | SRAL-M-H3   | 47                  | 0.91  | 0.99  | 0.91  | 200                 | 0.92  | 0.98  | 0.92  | 55                  | 0.69  | 0.99  | 0.79  | 47                  | 0.81  | 0.99  | 0.81  | 495                 | 0.99  | 0.96  | 0.97  |
| Training | 15 | SRAL2020BF  | 165                 | 0.90  | 1.00  | 0.99  | 102                 | 0.95  | 0.99  | 0.95  | 0                   | nan   | 0.99  | 0.00  | 0                   | nan   | 0.99  | 0.00  | 179                 | 1.00  | 0.97  | 0.96  |
| Training | 16 | SRAL2025M   | 163                 | 0.91  | 0.99  | 0.97  | 121                 | 0.88  | 0.99  | 0.94  | 116                 | 0.80  | 0.99  | 0.97  | 0                   | nan   | 0.97  | 0.00  | 190                 | 0.97  | 0.94  | 0.89  |
| Training | 17 | SRAL2026F   | 43                  | 0.70  | 1.00  | 1.00  | 0                   | nan   | 0.99  | 0.00  | 0                   | nan   | 0.97  | 0.00  | 0                   | nan   | 0.97  | 0.00  | 30                  | 1.00  | 0.81  | 0.79  |
| Training | 18 | SRAL2032BM  | 24                  | 0.79  | 0.98  | 0.59  | 199                 | 0.84  | 0.96  | 0.93  | 0                   | nan   | 0.94  | 0.00  | 30                  | 0.80  | 0.96  | 0.56  | 310                 | 0.86  | 0.98  | 0.98  |
| Training | 19 | SRAL2019M   | 314                 | 0.90  | 0.96  | 0.92  | 377                 | 0.80  | 0.98  | 0.96  | 0                   | nan   | 0.98  | 0.00  | 0                   | nan   | 0.94  | 0.00  | 282                 | 0.90  | 0.98  | 0.94  |
| Training | 20 | SRAL2006M   | 255                 | 0.85  | 0.95  | 0.92  | 73                  | 0.85  | 0.98  | 0.83  | 0                   | nan   | 0.99  | 0.00  | 0                   | nan   | 0.99  | 0.00  | 310                 | 0.94  | 0.92  | 0.91  |

- <sup>14</sup> **Movie M1. Videos of raw and detected droplets for representative talking, laughing and coughing events.**
- <sup>15</sup> **The videos play 10 times slower than the actual speed.**
